# Supplementary material for: Targeted Single-cell Isolation of Spontaneously Escaping Live Melanoma Cells for Comparative Transcriptomics
Source: Cancer Res Commun. 2023 Aug 11;3(8):1524–37. doi: 10.1158/2767-9764.CRC-22-0305 (PMC10416804; doi:10.1158/2767-9764.CRC-22-0305)
Supplement: Supplementary Figure 6 — shows an Amoeboid cell cohort gallery [file crc-22-0305-s06.pdf]

## Supplementary Figure 6

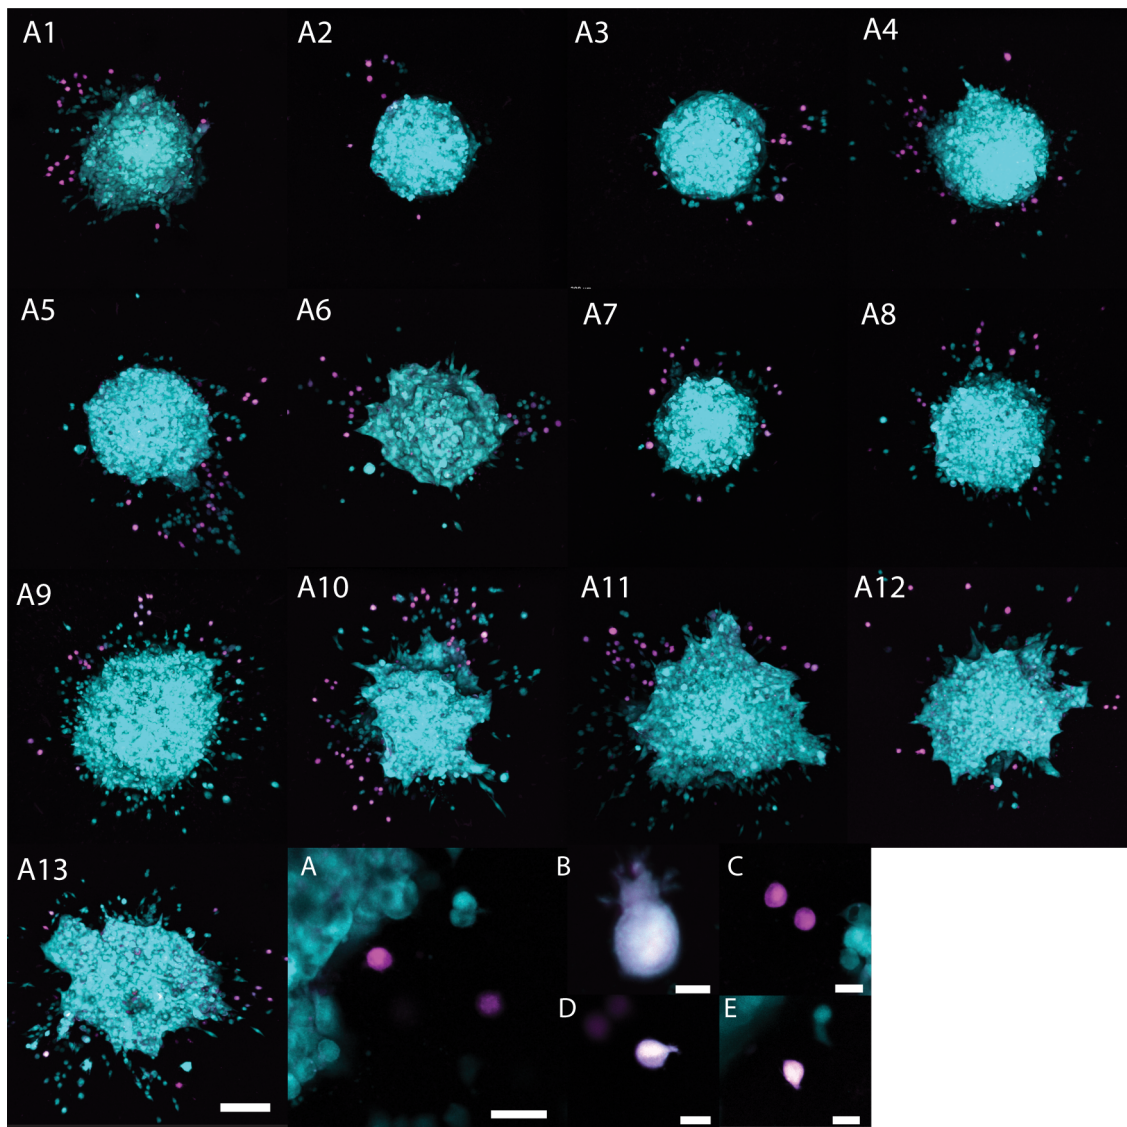

**Supplementary Figure 6 | Amoeboid cell cohort gallery.** Rounded amoeboid cells were photoconverted from 13 spheroid samples. Photoconverted cells are shown in magenta. Scale bar: 200  $\mu\text{m}$  for whole field of view; for A: 30  $\mu\text{m}$ ; B: 10  $\mu\text{m}$ ; C-E: 20  $\mu\text{m}$ .
