# Supplementary material for: Targeted Single-cell Isolation of Spontaneously Escaping Live Melanoma Cells for Comparative Transcriptomics
Source: Cancer Res Commun. 2023 Aug 11;3(8):1524–37. doi: 10.1158/2767-9764.CRC-22-0305 (PMC10416804; doi:10.1158/2767-9764.CRC-22-0305)
Supplement: Supplementary Table 1 — shows Cell type isolated, age (days) and number of cells sorted for each spheroid included in the study [file crc-22-0305-s10.xlsx]

## Sheet: Isolated cells
Supplementary Table 1 - Tearle et al. Cancer Research Communications 2023
Cell type isolated, age (days) and number of cells sorted for each spheroid included in the study
Spheroid ID	Cell type isolated	Age (days)	Cells sorted
E1	Epithelial	6	12
E2	Epithelial	7	5
E3	Epithelial	7	6
E4	Epithelial	7	1
E5	Epithelial	9	2
E6	Epithelial	9	2
E7	Epithelial	9	2
E8	Epithelial	9	2
E9	Epithelial	11	3
E10	Epithelial	11	3
E11	Epithelial	14	4
E12	Epithelial	16	6
Es1	Escaping	9	1
Es2	Escaping	9	1
Es3	Escaping	9	1
Es4	Escaping	9	2
Es5	Escaping	9	5
Es6	Escaping	9	3
Es7	Escaping	9	3
Es8	Escaping	9	1
Es9	Escaping	10	3
Es10	Escaping	11	3
Es11	Escaping	11	1
Es12	Escaping	14	5
Es13	Escaping	14	3
Es14	Escaping	14	3
Es15	Escaping	14	4
Es16	Escaping	15	6
Es17	Escaping	15	1
Es18	Escaping	16	1
Es19	Escaping	16	1
Es20	Escaping	16	5
Es21	Escaping	16	3
A1	Amoeboid	12	4
A2	Amoeboid	14	2
A3	Amoeboid	14	1
A4	Amoeboid	14	5
A5	Amoeboid	15	5
A6	Amoeboid	16	4
A7	Amoeboid	16	6
A8	Amoeboid	16	3
A9	Amoeboid	16	5
A10	Amoeboid	16	5
A11	Amoeboid	16	5
A12	Amoeboid	16	2
A13	Amoeboid	16	2
