# Supplementary material for: Targeted Single-cell Isolation of Spontaneously Escaping Live Melanoma Cells for Comparative Transcriptomics
Source: Cancer Res Commun. 2023 Aug 11;3(8):1524–37. doi: 10.1158/2767-9764.CRC-22-0305 (PMC10416804; doi:10.1158/2767-9764.CRC-22-0305)
Supplement: Supplementary Table 6 — shows Sorting events for each cell included in the final data set [file crc-22-0305-s15.xlsx]

## Sheet: Isolated cells
Supplementary Table 6 - Tearle et al. Cancer Research Communications 2023
Sorting event for each cell included in the final data set
Cell ID	Cell type	Age (days)	Sort event
A-73	Amo	16	D
A-101	Amo	16	D
A-102	Amo	16	E
A-103	Amo	15	E
A-105	Amo	16	E
A-109	Amo	16	E
A-111	Amo	15	E
A-115	Amo	15	E
A-94	Amo	16	E
A-97	Amo	16	E
A-98	Amo	16	H
A-99	Amo	15	E
A-58	Amo	16	H
E-16	Edge	9	A
E-06	Edge	7	A
E-07	Edge	7	B
E-11	Edge	7	B
E-17	Edge	6	B
E-54	Edge	11	C
E-64	Edge	11	C
E-24	Edge	6	C
E-128	Edge	16	E
E-134	Edge	16	E
Es-46	Leaving	11	C
Es-49	Leaving	11	C
Es-78	Leaving	14	D
Es-32	Leaving	14	D
Es-117	Leaving	16	E
Es-119	Leaving	15	E
Es-121	Leaving	16	E
Es-124	Leaving	16	E
Es-126	Leaving	15	E
Es-127	Leaving	16	E
Es-132	Leaving	15	E
Es-68	Leaving	10	I
